# Supplementary material for: Long-Term Efficacy and Safety of Evinacumab in Patients with Homozygous Familial Hypercholesterolemia: Real-World Clinical Experience
Source: MDPI journal article supplement (doi:10.3390/ph15111389), 2022-11-11
Supplement: s1 [file s1]

**Figure S1.** Percentage change from baseline in LDL-cholesterol with lipoprotein apheresis alone for individual patients on background of conventional lipid-lowering therapies

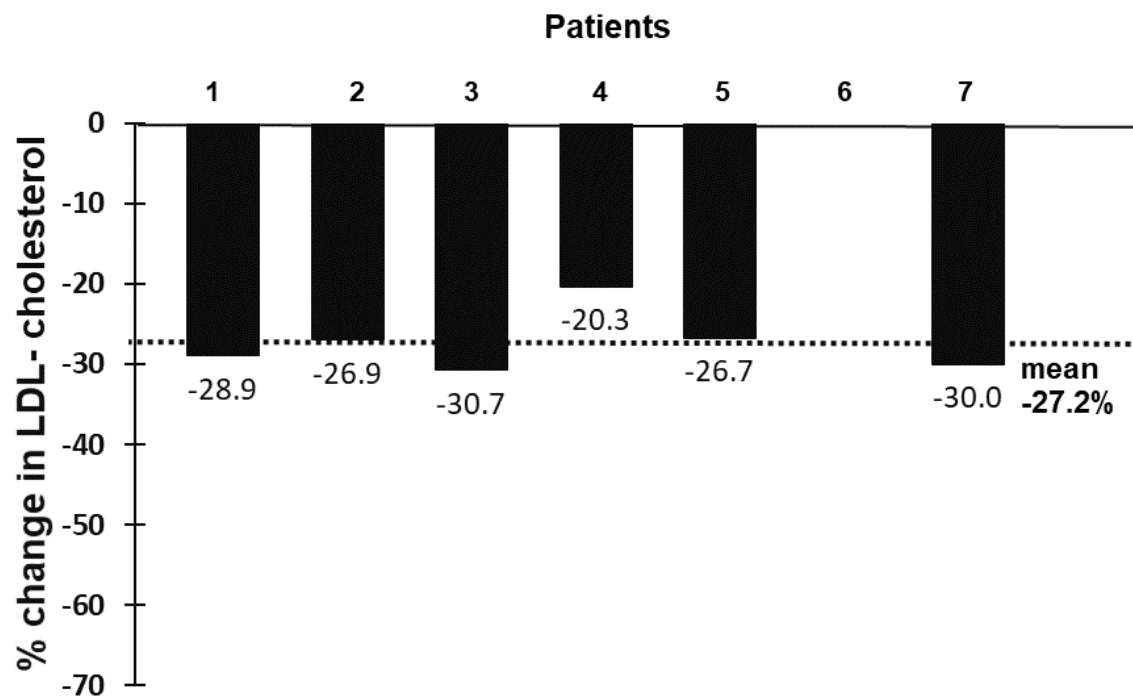

\* Patient 6 did not receive lipoprotein apheresis treatment

**Figure S2.** Change from baseline in total cholesterol (TC) (A), non-HDL-cholesterol (B) and apoB (C) during 24-month treatment for individual patients.

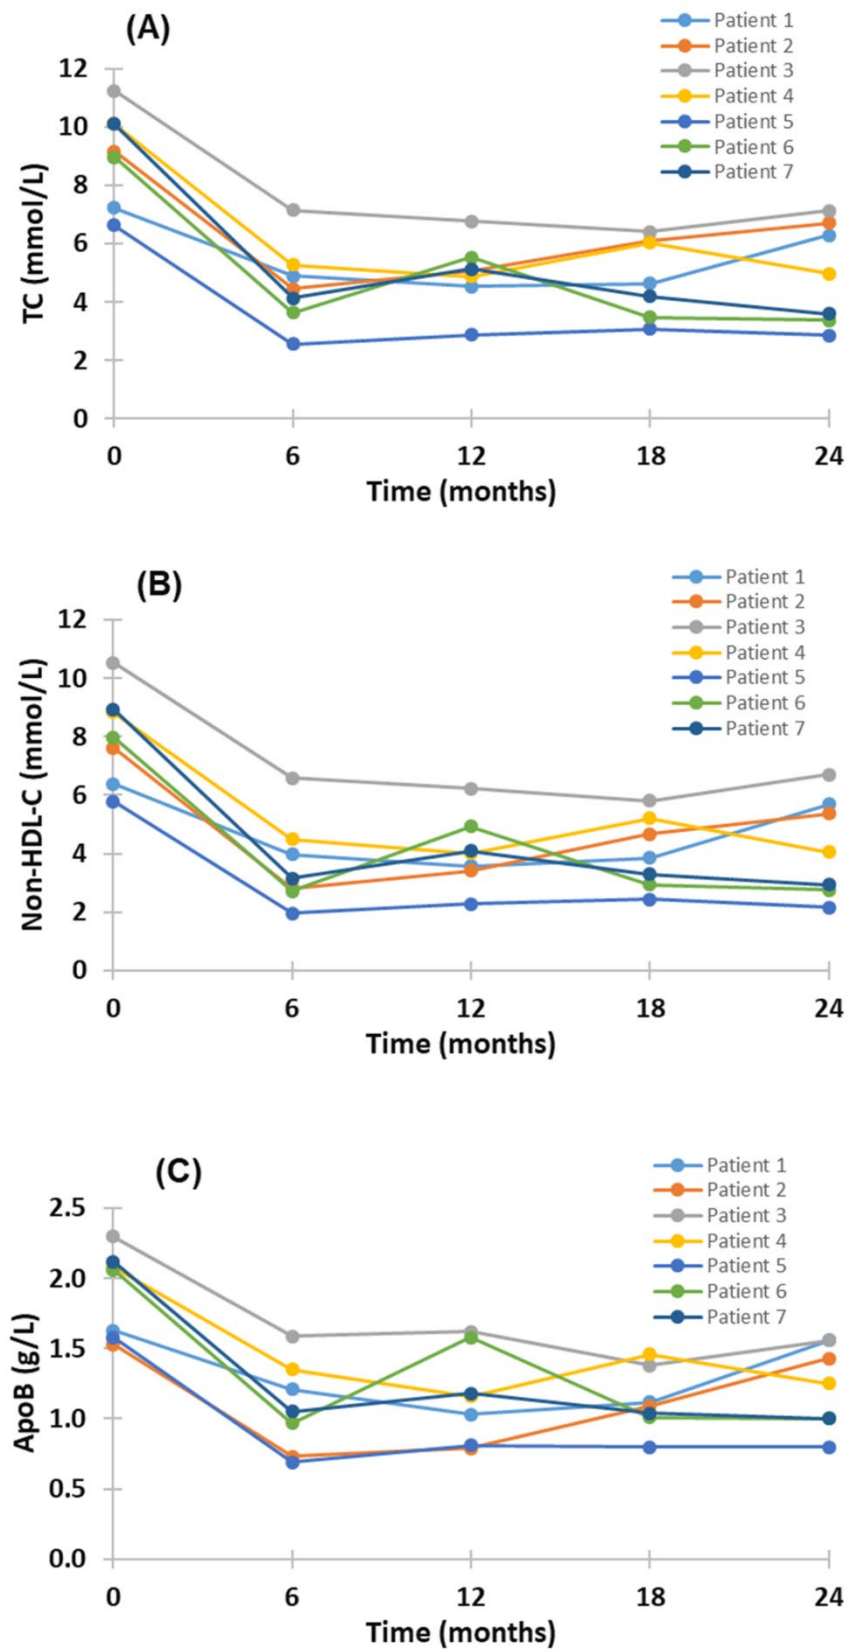

**Figure S3.** Change in plasma high-sensitivity C-reactive protein (hsCRP) concentration with evinacumab and lipoprotein apheresis during 24-month treatment (A) and the corresponding percentage change (B) at 24-month follow-up (B) for individual patients

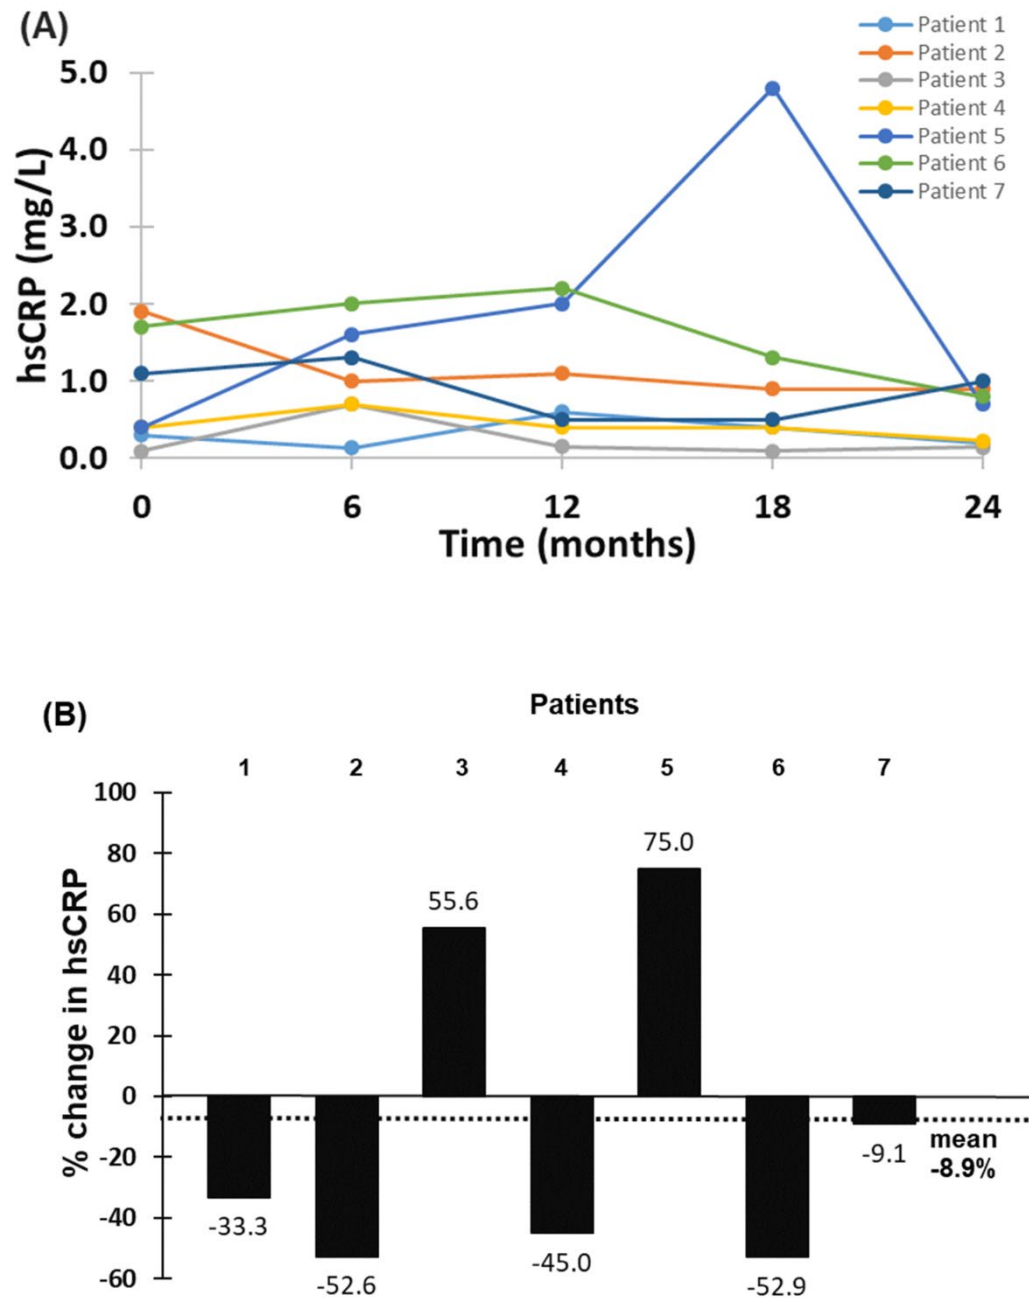

**Table S1.** Plasma lipid, lipoprotein and apolipoproteins concentrations of individual HoFH patient before and during therapy with evinacumab.

| Patient No | Time          | TC<br>(mmol/L) | TG<br>(mmol/L) | HDL-C<br>(mmol/L) | Non-HDL-C<br>(mmol/L) | LDL-C<br>(mmol/L) | REM-C<br>(mmol/L) | ApoA-I<br>(g/L) | ApoB<br>(g/L) | ApoC-III<br>(mg/L) | Lp(a)<br>(nmol/L) |
|------------|---------------|----------------|----------------|-------------------|-----------------------|-------------------|-------------------|-----------------|---------------|--------------------|-------------------|
| 1          | Pre-treatment | 7.2            | 1.79           | 0.85              | 6.38                  | 5.5               | 0.84              | 0.97            | 1.63          | 111                | 17                |
|            | 6 months      | 4.9            | 0.63           | 0.93              | 3.97                  | 3.7               | 0.29              | 0.90            | 1.21          | 38                 | 14                |
|            | 12 months     | 4.5            | 0.66           | 0.96              | 3.57                  | 3.3               | 0.31              | 0.85            | 1.03          | 37                 | 15                |
|            | 18 months     | 4.6            | 0.66           | 0.78              | 3.86                  | 3.6               | 0.31              | 0.85            | 1.12          | 36                 | 14                |
|            | 24 months     | 6.3            | 0.77           | 0.60              | 5.69                  | 5.3               | 0.35              | 0.77            | 1.56          | 45                 | 12                |
| 2          | Pre-treatment | 9.2            | 1.32           | 1.55              | 7.62                  | 7.0               | 0.60              | 1.43            | 1.53          | NA                 | 113               |
|            | 6 months      | 4.5            | 0.32           | 1.63              | 2.82                  | 2.7               | 0.15              | 1.26            | 0.73          | 37                 | 86                |
|            | 12 months     | 5.1            | 0.29           | 1.66              | 3.42                  | 3.3               | 0.13              | 1.22            | 0.79          | 29                 | 90                |
|            | 18 months     | 6.1            | 0.36           | 1.42              | 4.67                  | 4.5               | 0.16              | 1.27            | 1.09          | 30                 | 127               |
|            | 24 months     | 6.7            | 0.37           | 1.35              | 5.36                  | 5.2               | 0.18              | 1.32            | 1.43          | 48                 | 112               |
| 3          | Pre-treatment | 11.2           | 0.88           | 0.70              | 10.5                  | 10.13             | 0.41              | 0.78            | 2.3           | 66                 | 8                 |
|            | 6 months      | 7.2            | 0.63           | 0.57              | 6.6                   | 6.29              | 0.29              | 0.62            | 1.6           | 24                 | 9                 |
|            | 12 months     | 6.8            | 0.64           | 0.54              | 6.2                   | 5.93              | 0.29              | 0.65            | 1.6           | 23                 | 7                 |
|            | 18 months     | 6.4            | 0.52           | 0.62              | 5.8                   | 5.57              | 0.23              | 0.71            | 1.4           | 32                 | 9                 |
|            | 24 months     | 7.1            | 0.55           | 0.41              | 6.7                   | 6.45              | 0.26              | 0.51            | 1.6           | 16                 | 4                 |
| 4          | Pre-treatment | 10.1           | 1.16           | 1.27              | 8.83                  | 8.3               | 0.54              | 1.29            | 2.08          | 124                | 169               |
|            | 6 months      | 5.3            | 0.53           | 0.80              | 4.48                  | 4.3               | 0.23              | 0.89            | 1.35          | 20                 | 156               |
|            | 12 months     | 4.9            | 0.42           | 0.85              | 4.02                  | 3.8               | 0.19              | 0.91            | 1.16          | 32                 | 141               |
|            | 18 months     | 6.0            | 0.51           | 0.83              | 5.20                  | 5.0               | 0.23              | 1.00            | 1.46          | 27                 | 172               |
|            | 24 months     | 5.0            | 0.52           | 0.91              | 4.06                  | 3.8               | 0.23              | 1.03            | 1.25          | 34                 | 190               |
| 5          | Pre-treatment | 6.6            | 0.76           | 0.85              | 5.78                  | 5.4               | 0.34              | 0.99            | 1.58          | 56                 | 16                |
|            | 6 months      | 2.6            | 0.53           | 0.60              | 1.96                  | 1.7               | 0.22              | 0.67            | 0.69          | <9.4               | 12                |
|            | 12 months     | 2.9            | 0.54           | 0.60              | 2.27                  | 2.0               | 0.25              | 0.72            | 0.81          | <9.4               | 13                |
|            | 18 months     | 3.1            | 0.50           | 0.65              | 2.43                  | 2.2               | 0.23              | 0.78            | 0.80          | <9.4               | 12                |
|            | 24 months     | 2.9            | 0.51           | 0.70              | 2.15                  | 1.9               | 0.23              | 0.77            | 0.80          | 15                 | 12                |
| 6          | Pre-treatment | 9.0            | 1.86           | 0.98              | 7.98                  | 7.1               | 0.86              | 1.16            | 2.06          | 123.3              | 122               |
|            | 6 months      | 3.6            | 0.95           | 0.91              | 2.72                  | 2.3               | 0.44              | 1.03            | 0.97          | 27.6               | 47                |
|            | 12 months     | 5.5            | 1.02           | 0.62              | 4.92                  | 4.5               | 0.47              | 0.82            | 1.58          | 21.6               | 53                |
|            | 18 months     | 3.5            | 0.80           | 0.54              | 2.93                  | 2.6               | 0.37              | 0.74            | 1.01          | <9.4               | 66                |
|            | 24 months     | 3.4            | 0.95           | 0.62              | 2.75                  | 2.3               | 0.44              | 0.77            | 1.00          | 20.4               | 32                |
| 7          | Pre-treatment | 10.1           | 0.53           | 1.17              | 8.93                  | 8.7               | 0.23              | 1.31            | 2.12          | NA                 | 157               |
|            | 6 months      | 4.1            | 0.5            | 0.98              | 3.16                  | 2.9               | 0.23              | 1.03            | 1.05          | 11.9               | 65                |
|            | 12 months     | 5.1            | 0.47           | 1.04              | 4.09                  | 3.9               | 0.20              | 1.08            | 1.18          | 23.3               | 77                |
|            | 18 months     | 4.2            | 0.43           | 0.91              | 3.29                  | 3.1               | 0.21              | 1.01            | 1.04          | 11.20              | 82                |
|            | 24 months     | 3.6            | 0.41           | 0.67              | 2.93                  | 2.8               | 0.18              | 0.75            | 1.00          | <9.4               | 65                |
